# Supplementary material for: A chitosan-based cascade-responsive drug delivery system for triple-negative breast cancer therapy
Source: J Nanobiotechnology. 2019 Sep 10;17:95. doi: 10.1186/s12951-019-0529-4 (PMC6737697; doi:10.1186/s12951-019-0529-4)
Supplement: Supplementary file 1 — Additional file 1: Table S1. The primer sequences for GAPDH, Bcl-2, Bax, Caspase-3, PARP, PTEN and p53. Figure S1. 1H NMR spectra of (A) CS in D2O, (B) CS-RAFT in DMSO-d6 and (C) CS-co-PNVCL1 in DMSO-d6. Figure S2. Size distributions of NPs formed from (A) CS, (B) CS-co-PNVCL, (C) CPP-CS-co-PNVCL1, and (D) CPP-CS-co-PNVCL1@DOX NPs. (E) The particle size of the CPP-CS-co-PNVCL1@DOX NPs during storage for 7 days. Values are given as mean ± S.D (n = 3). Figure S3. MMP-2 protein expression levels in HUVEC and MCF-7 cells. **P < 0.01. Data are given as mean ± S.D (n = 3). Figure S4. IC50 values against MCF-7 cells for the different formulations (n = 6; results are shown as mean ± S.D, *P < 0.05, **P < 0.01 compared to free DOX). Figure S5. Hemocompatibility and pharmacokinetics. (A) Hemolytic activity of free DOX, CPP-CS-co-PNVCL1 and CPP-CS-co-PNVCL1@DOX NPs on rat red blood cells (n = 3, mean ± S.D). (B) Plasma concentration versus time curves for free DOX and CPP-CS-co-PNVCL1@DOX NPs in SD rats (n = 3, mean ± S.D). Figure S6. Representative images of tumors in MCF-7 xenograft nude mice after treatment for 30 days. The arrows indicate the tumor foci. Figure S7. mRNA expression levels for Bcl-2, Bax, Caspase-3, PARP, PTEN, and p53 in the tumor tissues of MCF-7 tumor-bearing mice after treatment for 30 days. n = 6, results shown as mean ± S.D; *P < 0.05, **P < 0.01 as compared to the saline group. [file 12951_2019_529_MOESM1_ESM.docx]

**Additional file 1**

**A chitosan-based cascade-responsive drug delivery system for** **triple-negative breast cancer therapy**

Shiwei Niu1, Gareth R. Williams2, Jianrong Wu1, Junzi Wu3, Xuejing Zhang1, Xia Chen1, Shude Li4, Jianlin Jiao5*and Li-Min Zhu1*

1College of Chemistry, Chemical Engineering and Biotechnology, Donghua University, Shanghai, 201620, PR China

2UCL School of Pharmacy, University College London, 29-39 Brunswick Square, London WC1N 1AX, UK

3School of Basic Medicine, Yunnan University of Traditional Chinese Medicine, Kunming 650500, PR China

4Department of Biochemistry and Molecular Biology, School of Basic Medicine, Kunming Medical University, Kunming 650500, PR China

5Technology Transfer Center, Kunming Medical University, Kunming, 650031, China

Correspondence: [lzhu@dhu.edu.cn](mailto:lzhu@dhu.edu.cn); [jiaojianlin66@163.com](mailto:jiaojianlin66@163.com)

**Table S1.** The primer sequences for *GAPDH*, *Bcl-2*, *Bax*, *Caspase-3*, *PARP*, *PTEN* and *p53*.

| **Primer** | **Direction** | **Sequence** |
| --- | --- | --- |
| *GAPDH* | Forward | AAGAGGGATGCTGCCCTTAC |
| Reverse | ATCCGTTCACACCGACCTTC |
| *Bcl-2* | Forward | GACTGAGTACCTGAACCGGC |
| Reverse | TCACTTGTGGCCCAGGTATG |
| *Bax* | Forward | CTGGATCCAAGACCAGGGTG |
| Reverse | GTGAGGACTCCAGCCACAAA |
| *Caspase-3* | Forward | AGCTTGGAACGGTACGCTAA |
| Reverse | CCACTGACTTGCTCCCATGT |
| *PARP* | Forward | GCGGAGAAGACATTGGGTGA |
| Reverse | ACCATCTTCTTGGACAGGCG |
| *PTEN* | Forward | TTGTTAGCCTCTTGATGTGTGC |
| Reverse | CCATTGGTAGCCAAACGGAA |
| *p53* | Forward | AAACGCTTCGAGATGTTCCG |
| Reverse | CAAGGCTTGGAAGGCTCTAGG |


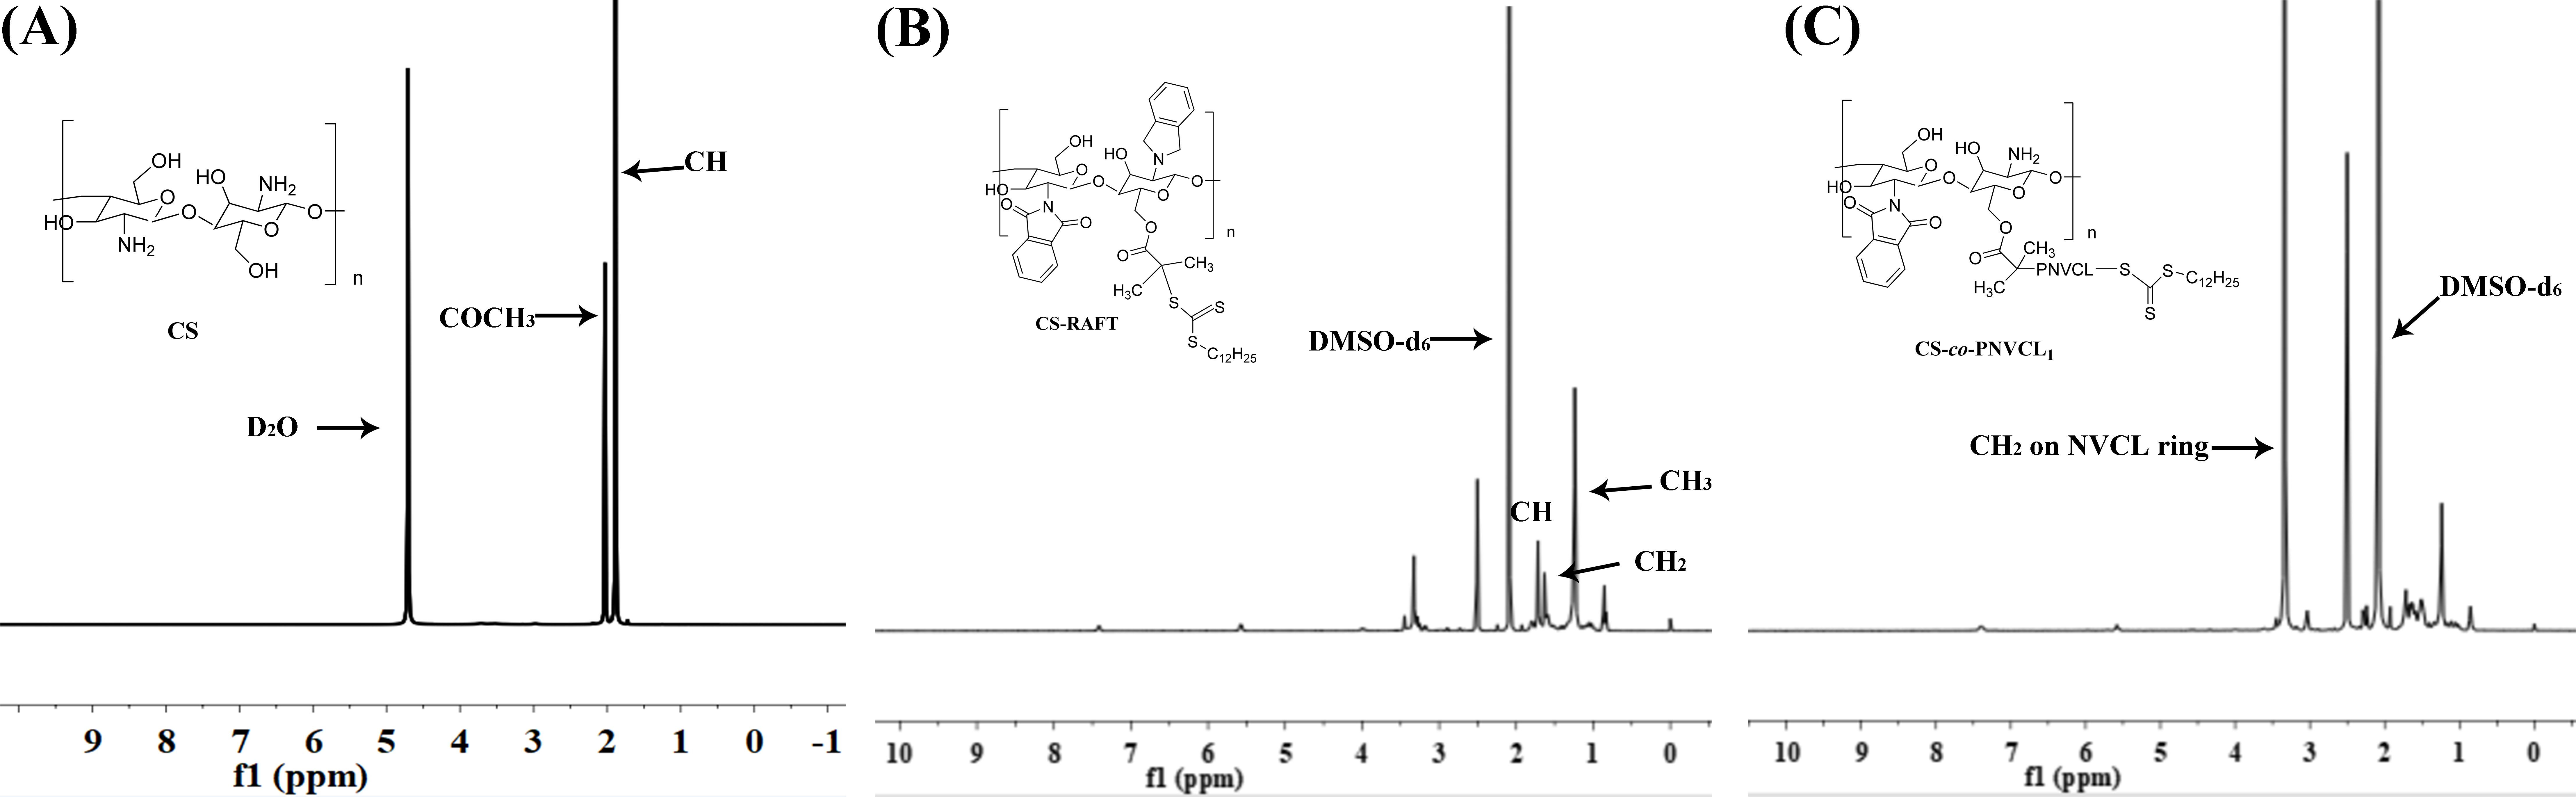


**Fig. S1** 1H NMR spectra of (A) CS in D2O, (B) CS-RAFT in DMSO-d6 and (C) CS-*co*-PNVCL1 in DMSO-d6.





**Fig. S2** Size distributions of NPs formed from (A) CS, (B) CS-*co*-PNVCL, (C) CPP-CS-*co*-PNVCL1, and (D) CPP-CS-*co*-PNVCL1@DOX NPs. (E) The particle size of the CPP-CS-*co*-PNVCL1@DOX NPs during storage for 7 days. Values are given as mean ± S.D. (*n* = 3).


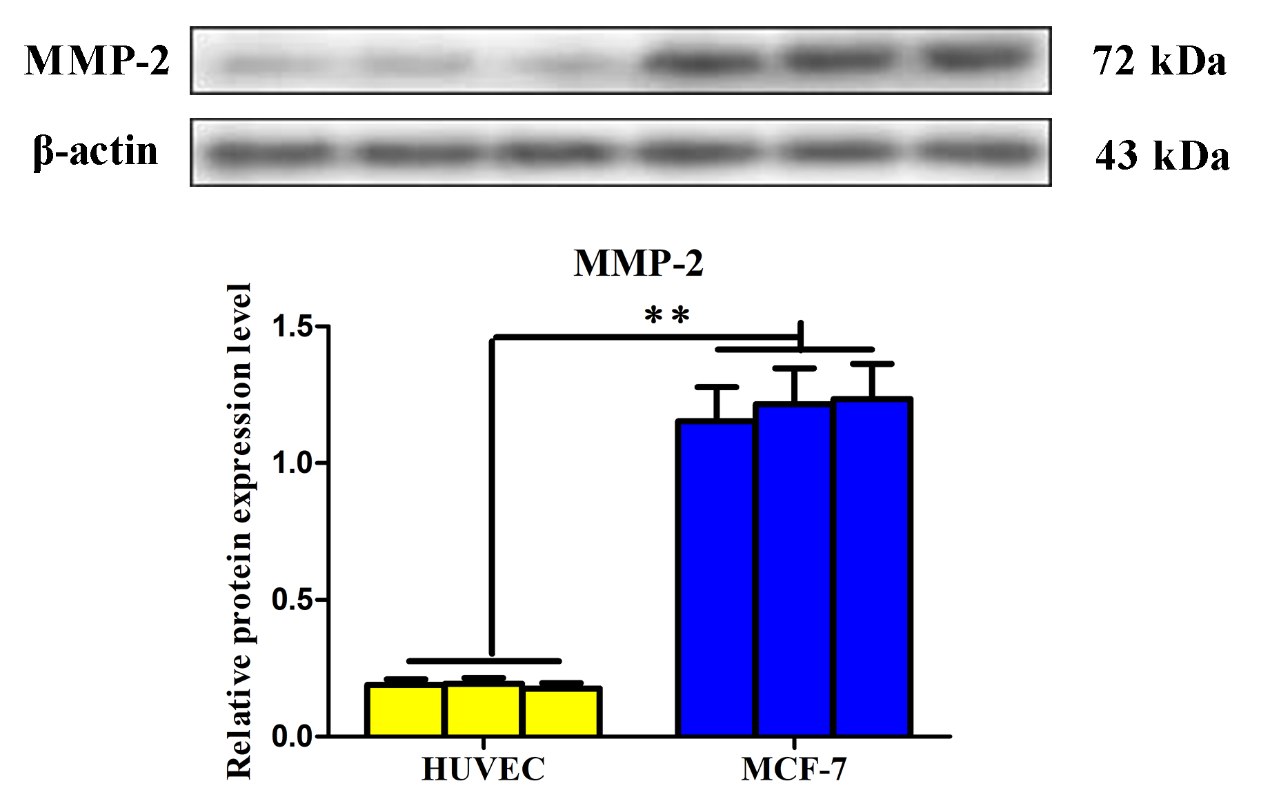


**Fig. S3** MMP-2 protein expression levels in HUVEC and MCF-7 cells. ***P* < 0.01. Data are given as mean ± S.D. (*n* = 3).


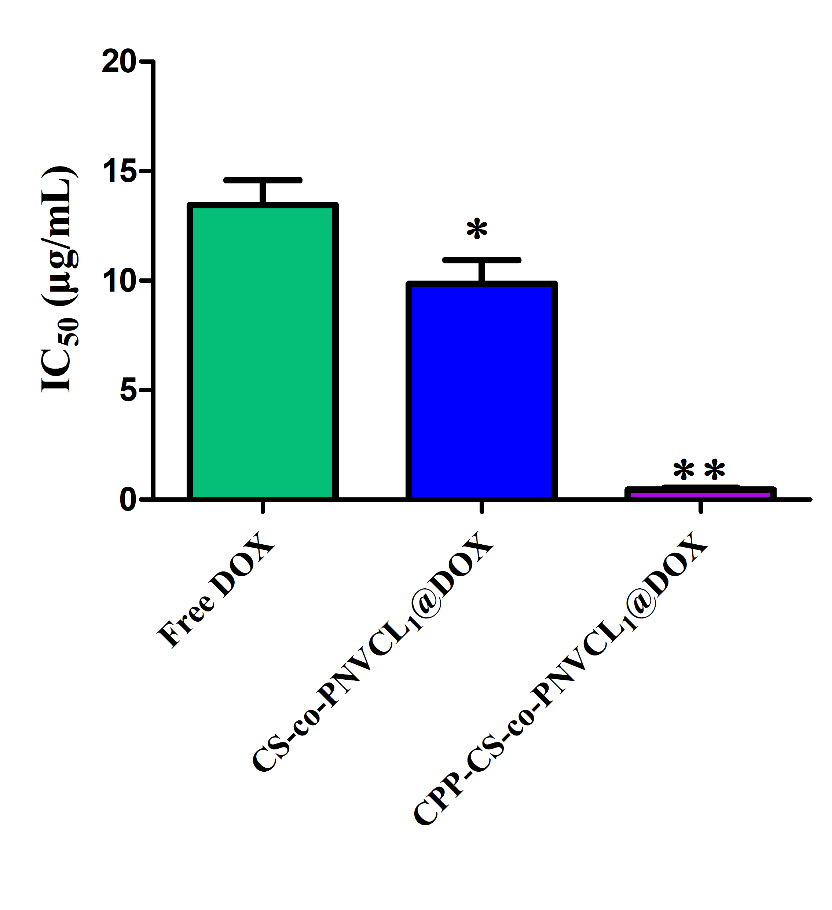


**Fig. S4** IC50 values against MCF-7 cells for the different formulations (*n* =6; results are shown as mean ± S.D., * *P* < 0.05, ** *P* < 0.01 compared to free DOX).


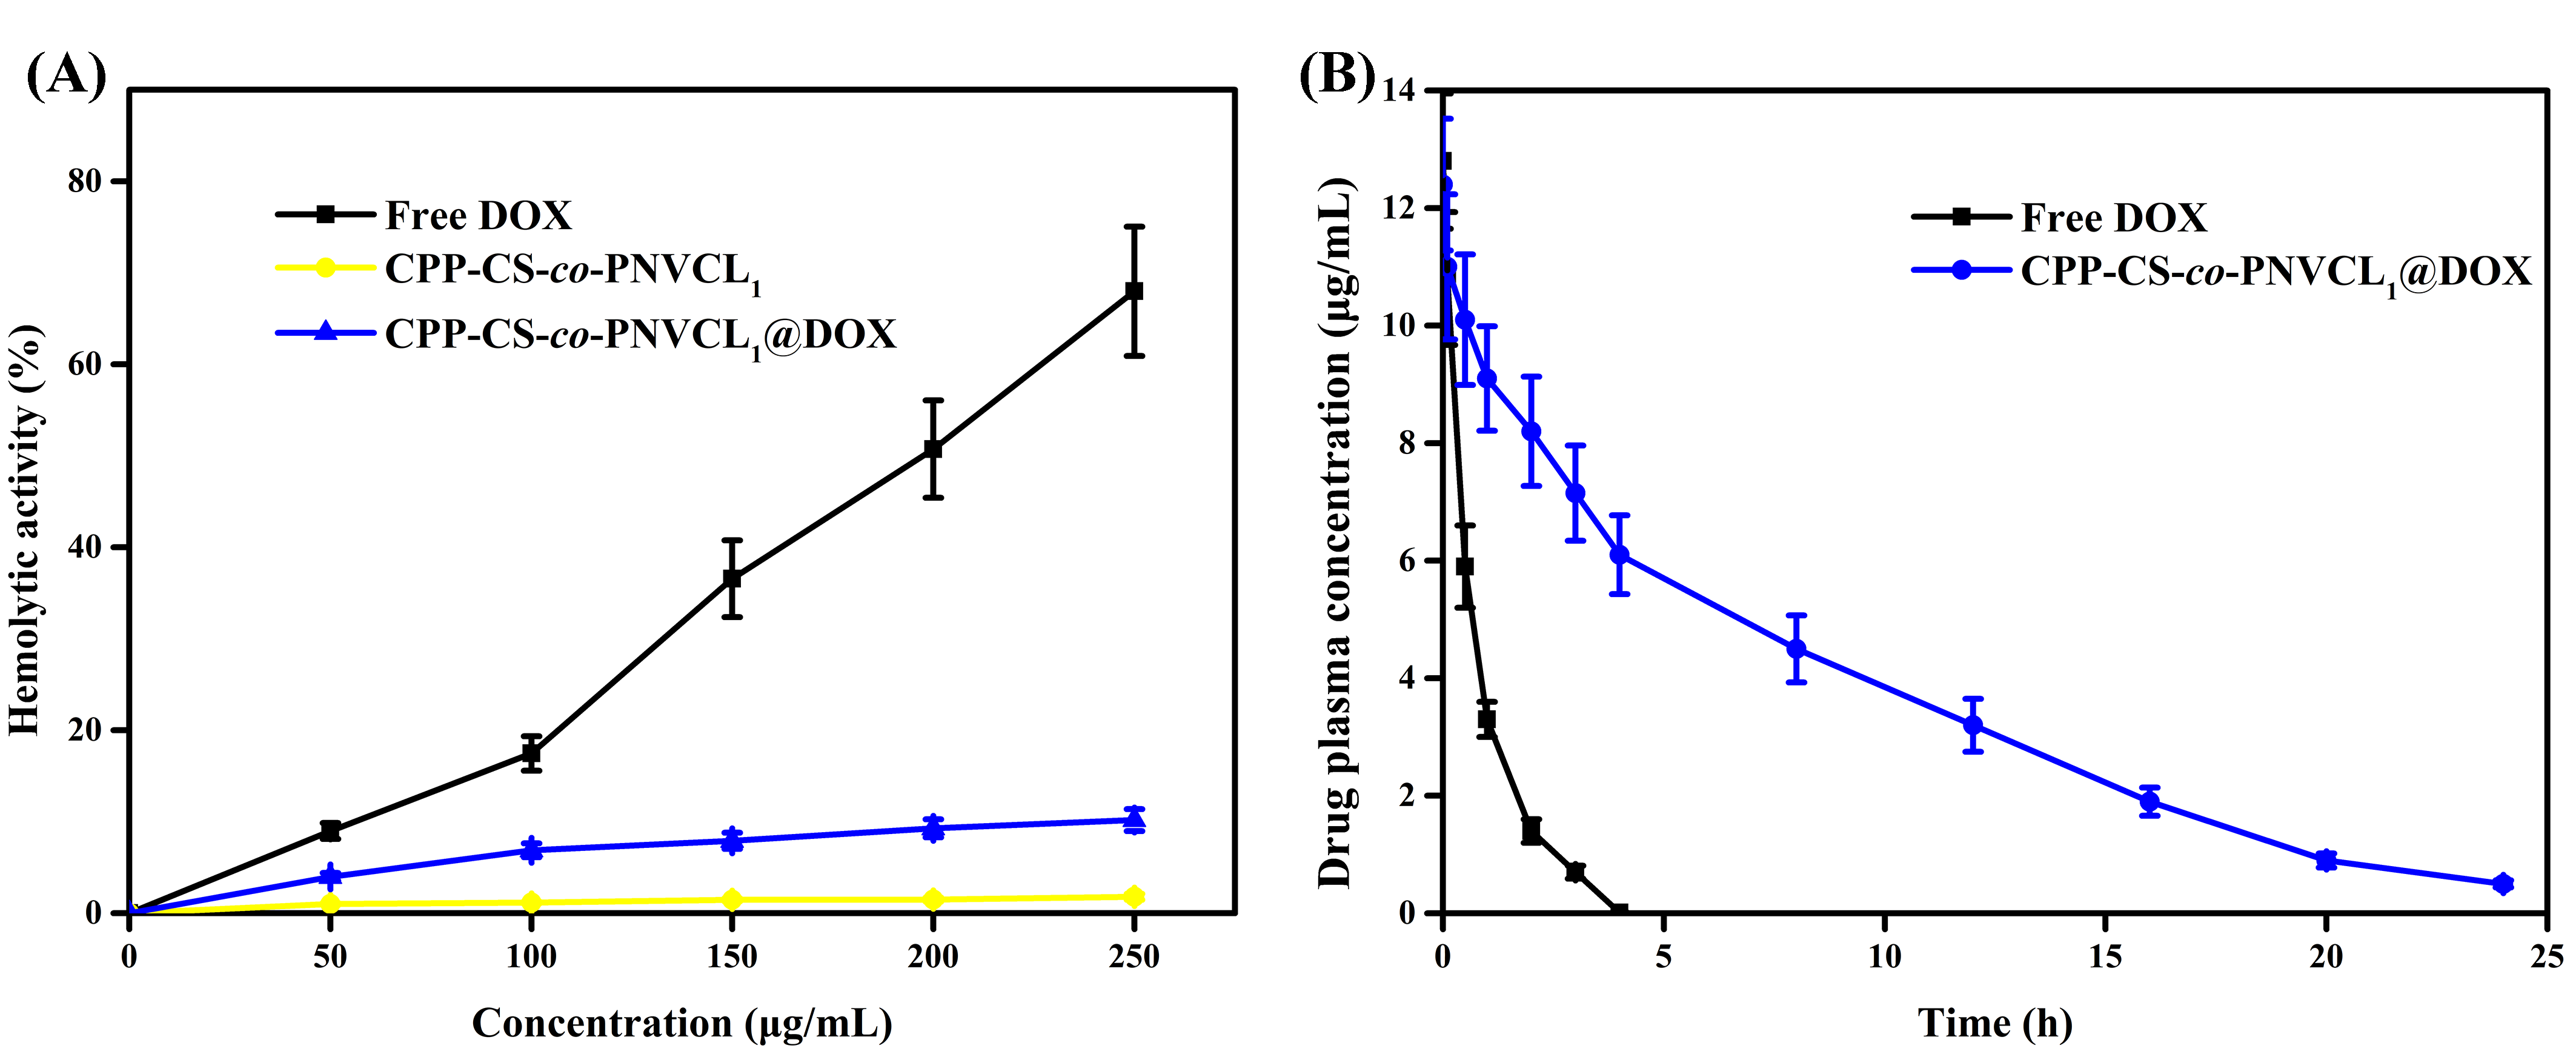


**Fig. S5** Hemocompatibility and pharmacokinetics. (A) Hemolytic activity of free DOX, CPP-CS-*co*-PNVCL1 and CPP-CS-*co*-PNVCL1@DOX NPs on rat red blood cells (*n* = 3, mean ± S.D.). (B) Plasma concentration versus time curves for free DOX and CPP-CS-*co*-PNVCL1@DOX NPs in SD rats (*n* = 3, mean ± S.D.).


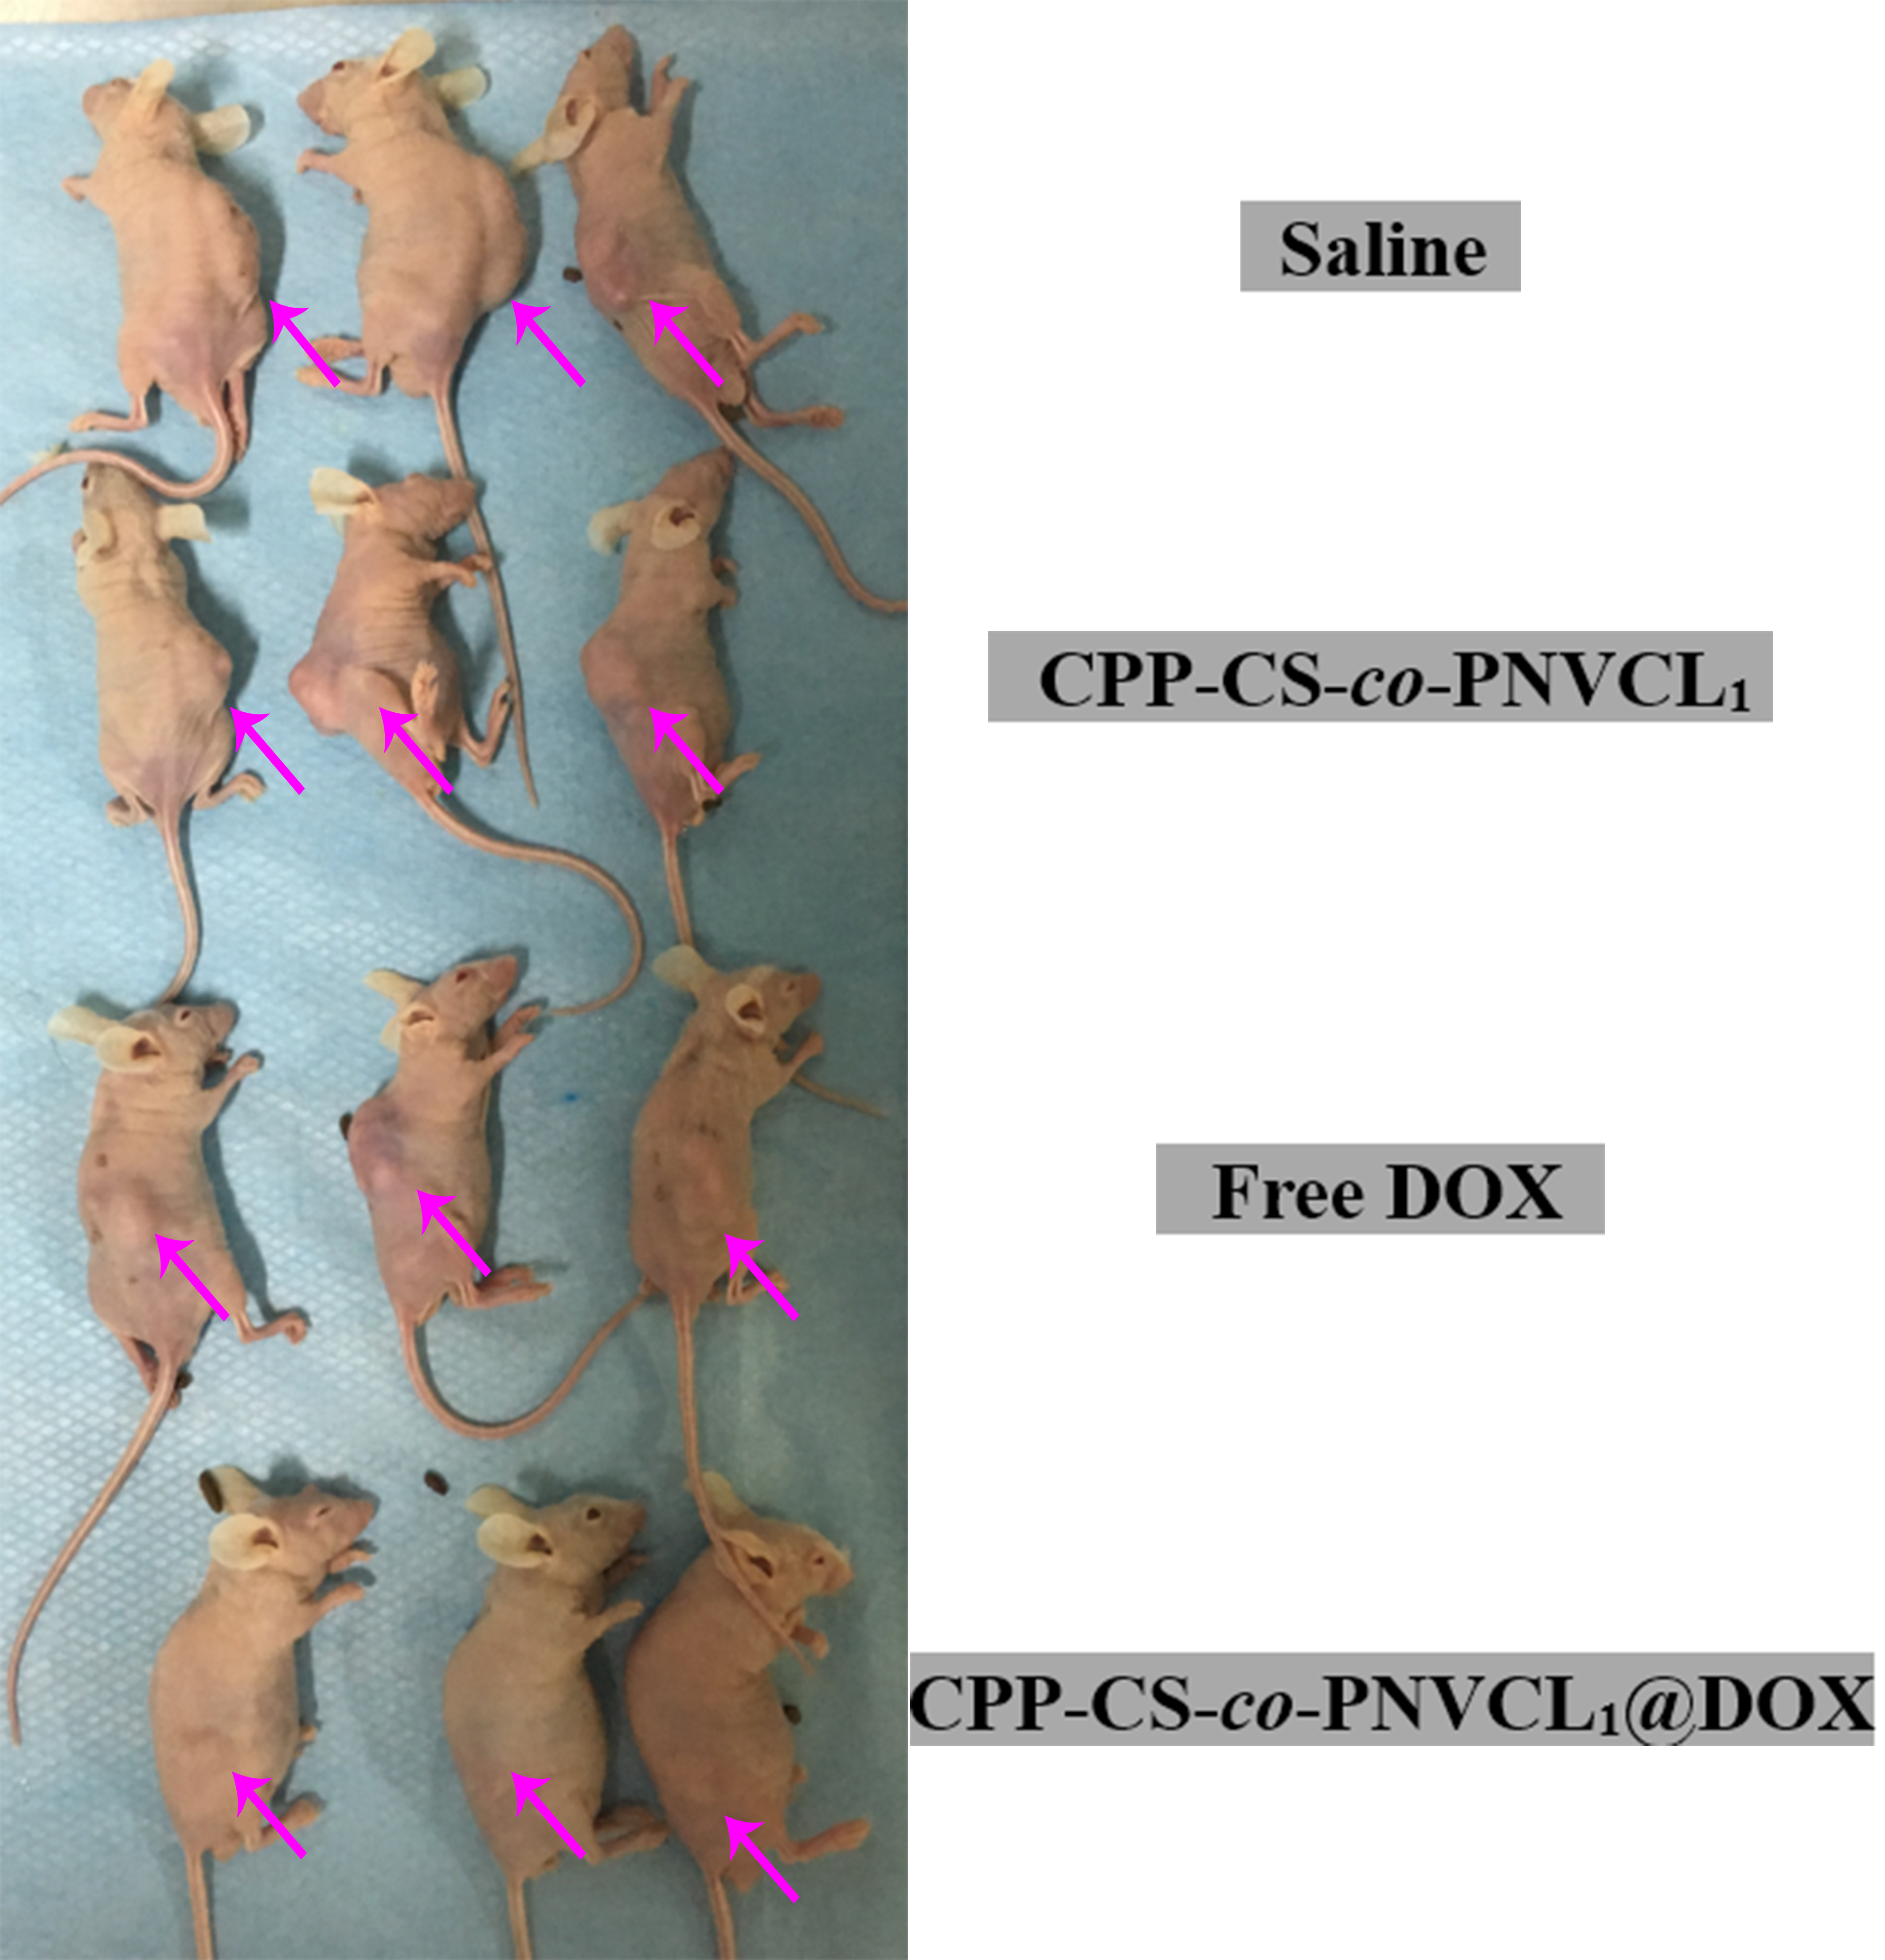


**Fig. S6** Representative images of tumors in MCF-7 xenograft nude mice after treatment for 30 days. The arrows indicate the tumor foci.


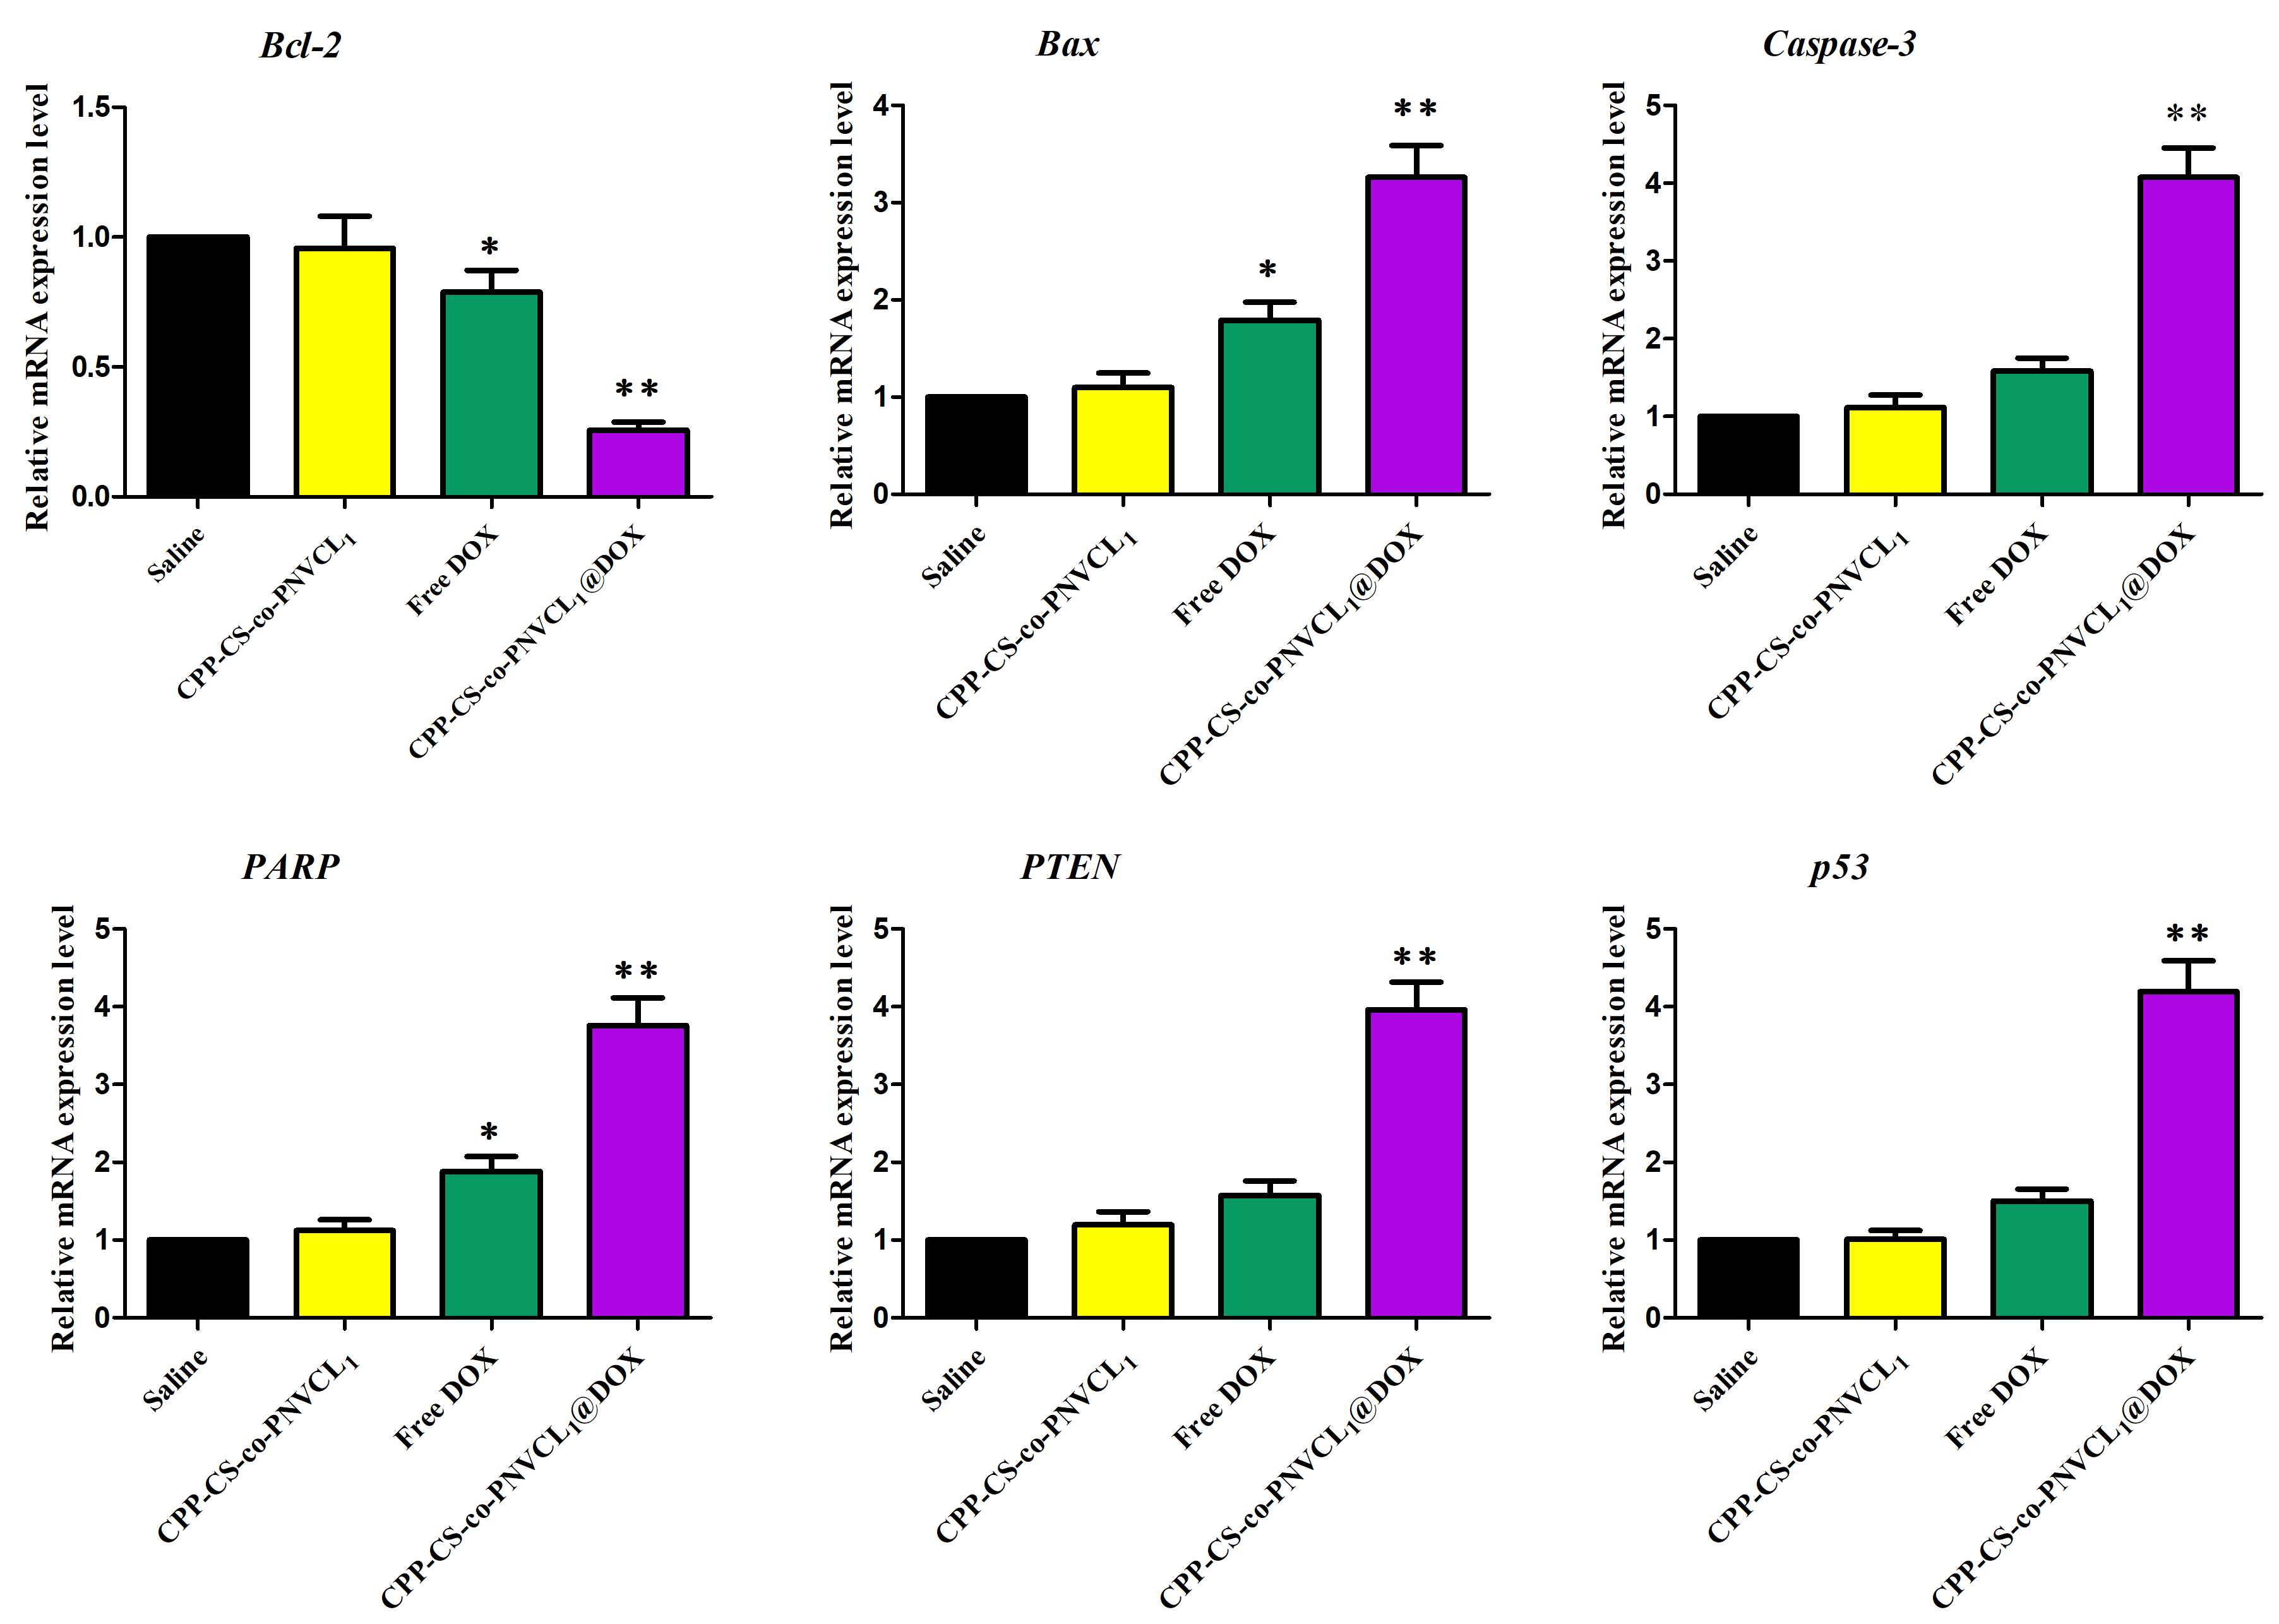


**Fig. S7** mRNA expression levels for *Bcl-2*, *Bax*, *Caspase-3*, *PARP*, *PTEN*, and *p53* in the tumor tissues of MCF-7 tumor-bearing mice after treatment for 30 days. *n* = 6, results shown as mean ± S.D.; * *P* < 0.05, ** *P* < 0.01 as compared to the saline group.
